# Supplementary material for: Humanized yeast to model human biology, disease and evolution
Source: PubMed Central journal article supplement (PMC9194483; doi:10.1242/dmm.049309), 2022-06-06
Supplement: dmm-15-049309-s1.pdf [file dmm-15-049309-s1.pdf]

**Table S1. List of all functionally replaceable human genes in yeast**

[Click here to download Table S1](#)

**Table S2. List of functionally replaceable human genes with associated OMIM or Orphanet disease phenotypes**

[Click here to download Table S2](#)
